# Supplementary material for: Reciprocal Heterospecific Pollen Interference among Alien and Native Species
Source: Preprints.org preprint supplement (doi:10.20944/preprints202002.0110.v1), 2020-02-09
Supplement: Supplementary file 1 [file supplementary]

## Supporting Information

**Table S.1** Species and respective family, status and flowering time (Kühn, Durka & Klotz 2004) used in the two datasets to study the heterospecific pollen interference in native and alien plants. Further information about the origin of the used seed or seedling material is provided

| Species                         | Family          | Status | Dataset | Naturalized in Germany | Native range    | Flowering time | Seed/seedling origin    | Type     | Pot # | Self-compatibility |
|---------------------------------|-----------------|--------|---------|------------------------|-----------------|----------------|-------------------------|----------|-------|--------------------|
| <i>Taraxacum officinale</i>     | Asteraceae      | Native | 1       | Native                 | Europe          | 3-10*          | Rieger-Hofmann          | Seed     | 60    | self-incompatible  |
| <i>Crepis setosa</i>            | Asteraceae      | Alien  | 1       | Yes                    | Southern Europe | 6-8            | Botanical garden Uni KN | Seed     | 60    | self-compatible    |
| <i>Sinapis alba</i>             | Brassicaceae    | Alien  | 1       | Yes                    | Mediterranean   | 6-10           | Rieger-Hofmann          | Seed     | 60    | self-incompatible  |
| <i>Knautia arvensis</i>         | Caprifoliaceae  | Native | 1       | Native                 | Europe          | 5-9            | Botanical garden Uni KN | Seed     | 60    | self-compatible    |
| <i>Salvia pratensis</i>         | Lamiaceae       | Native | 1       | Native                 | Europe          | 5-8            | Botanical garden Uni KN | Seed     | 60    | self-compatible    |
| <i>Papaver rhoeas</i>           | Papaveraceae    | Native | 1       | Native                 | Europe          | 5-9            | Botanical garden Uni KN | Seed     | 60    | self-incompatible  |
| <i>Eschscholzia californica</i> | Papaveraceae    | Alien  | 1       | Unstable               | North America   | 6-10           | Botanical garden Uni KN | Seed     | 60    | self-incompatible  |
| <i>Veronica persica</i>         | Plantaginaceae  | Alien  | 1       | Yes                    | Eurasia         | 2-10           | Botanical garden Uni KN | Seed     | 60    | self-compatible    |
| <i>Nigella damascena</i>        | Ranunculaceae   | Alien  | 1       | Yes                    | Mediterranean   | 6-8            | Botanical garden Uni KN | Seed     | 60    | self-compatible    |
| <i>Potentilla erecta</i>        | Rosaceae        | Native | 1       | Native                 | Europe          | 6-9            | Rieger-Hofmann          | Seed     | 60    | self-incompatible  |
| <i>Solanum nigrum</i>           | Solanaceae      | Native | 1       | Native                 | Europe          | 6-10           | Botanical garden Uni KN | Seed     | 60    | self-compatible    |
| <i>Datura stramonium</i>        | Solanaceae      | Alien  | 1       | Yes                    | North America   | 6-10           | Botanical garden Uni KN | Seed     | 60    | self-compatible    |
| <i>Saponaria officinalis</i>    | Caryophyllaceae | Native | 2       | Native                 | Europe          | 6-9            | Ammann                  | Seedling | 60    | self-compatible    |
| <i>Lotus corniculatus</i>       | Fabaceae        | Native | 2       | Native                 | Europe          | 6-8            | Botanical garden Uni KN | Seed     | 60    | self-compatible    |
| <i>Geranium pratense</i>        | Geraniaceae     | Native | 2       | Native                 | Europe          | 6-8            | 47.759743, 8.813922     | Seedling | 60    | self-compatible    |
| <i>Geranium pyrenaicum</i>      | Geraniaceae     | Alien  | 2       | Yes                    | Southern Europe | 5-10           | 47.759743, 8.813922     | Seedling | 60    | self-compatible    |
| <i>Chelidonium majus</i>        | Papaveraceae    | Native | 2       | Native                 | Europe          | 4-10           | 47.759743, 8.813922     | Seedling | 60    | self-compatible    |

|                            |                |        |   |        |                       |      |                         |      |    |                   |
|----------------------------|----------------|--------|---|--------|-----------------------|------|-------------------------|------|----|-------------------|
| <i>Papaver somniferum</i>  | Papaveraceae   | Alien  | 2 | Yes    | Eastern Mediterranean | 6-8  | Botanical garden Uni KN | Seed | 60 | self-incompatible |
| <i>Linaria vulgaris</i>    | Plantaginaceae | Native | 2 | Native | Europe                | 6-10 | Botanical garden Uni KN | Seed | 60 | self-incompatible |
| <i>Nicandra physalodes</i> | Solanaceae     | Alien  | 2 | Yes    | South America         | 7-10 | Botanical garden Uni KN | Seed | 60 | self-compatible   |

\*Numbers indicating months

**Table S.2** Greenhouse conditions for the two datasets

| Dataset   | Greenhouse conditions                                  |                                            |                                                                                                                 |
|-----------|--------------------------------------------------------|--------------------------------------------|-----------------------------------------------------------------------------------------------------------------|
|           | Temperature                                            | Aeratiopn                                  | Light                                                                                                           |
| Dataset 1 | Temperature: 15°C at night time, 20°C during day time. | Aeration: opening when Temperature > 24°C. | Additional light: 110 $\mu\text{m}^2\text{s}^{-1}$ light intensity, 6:00–8:30 and 16:00–20:00. (November–March) |
| Dataset 2 | Temperature: 18°C at night time, 20°C during day time. | Aeration: opening when Temperature > 24°C. | Additional light: 110 $\mu\text{m}^2\text{s}^{-1}$ light intensity, 5:00–8:30 and 18:00–21:00. (February–May)   |

**Table S.3** Binomial and Gaussian models including phylogenetic distance and the quadratic phylogenetic distance between pollen donor and recipient species as explanatory variable, for HP interference measured based on fruit set and seed set. Seed set is expressed as the natural log of the ratio of the mean number of seeds per plant and the mean number of seeds for conspecific pollen treatment.

| Phylogenetic distance (PD) | Fruit Set          |                      | Seed Set           |                      |
|----------------------------|--------------------|----------------------|--------------------|----------------------|
| Parameter                  | Estimate (SE)      | P (>X <sup>2</sup> ) | Estimate (SE)      | P (>X <sup>2</sup> ) |
| <i>Fixed terms</i>         |                    |                      |                    |                      |
| Intercept                  | 1.663 (0.398)      | 0.0151               | -0.5877 (0.129)    | 0.0134               |
| PD                         | -0.0482 (0.184)    | 0.0624               | -0.0575 (0.0820)   | 0.2037               |
| PD <sup>2</sup>            | -0.0803 (0.056)    | 0.1587               | 0.0012 (0.0261)    | 0.9639               |
| <i>Random terms</i>        | Standard deviation |                      | Standard deviation |                      |
| Dataset                    | 0.000              |                      | 0.000              |                      |
| Recipient Species          | 1.443              |                      | 0.454              |                      |
| Donor Species              | 0.497              |                      | 0.154              |                      |
| <i>AIC</i>                 | 958.3              |                      | 948.6              |                      |

\*SE: standard error. AIC: Akaike information criterion

**Table S.4** Binomial and Gaussian models including trait distance and the quadratic trait distance between pollen donor and recipient species as explanatory variable, for HP interference measured based on fruit set and seed set. Seed set is expressed as the natural log of the ratio of the mean number of seeds per plant and the mean number of seeds for conspecific pollen treatment.

| Trait distance (TD) | Fruit Set             |                      | Seed Set               |                      |
|---------------------|-----------------------|----------------------|------------------------|----------------------|
| Parameter           | Estimate (SE)         | P (>X <sup>2</sup> ) | Estimate (SE)          | P (>X <sup>2</sup> ) |
| <i>Fixed terms</i>  |                       |                      |                        |                      |
| Intercept           | <b>1.6539 (0.397)</b> | <b>0.0160</b>        | <b>-0.5564 (0.134)</b> | <b>0.0172</b>        |
| TD                  | 0.1051 (0.100)        | 0.5147               | 0.0300 (0.050)         | 0.6995               |
| TD <sup>2</sup>     | -0.0909 (0.068)       | 0.1834               | -0.0284 (0.0346)       | 0.4180               |
| <i>Random terms</i> | Standard deviation    |                      | Standard deviation     |                      |
| Dataset             | 0.000                 |                      | 0.000                  |                      |
| Recipient Species   | 1.438                 |                      | 0.471                  |                      |
| Donor Species       | 0.486                 |                      | 0.158                  |                      |
| <i>AIC</i>          | <b>961.5</b>          |                      | <b>949.4</b>           |                      |

\*SE: standard error. AIC: Akaike information criterion

**Table S.5** Linear hypothesis testing and multiple comparisons for the two models with a custom set contrast matrix for both fruit set and seed set. For fruit set, a binomial Generalized Linear Mixed Model (GLMM) was used. For seed set (for the subset of flowers that had produced fruits), a Linear Mixed Model (LMM) was used after log-transforming the response variable. As explanatory variable a dummy factor with six levels was used: (1) conspecific-pollen-only treatment for self-compatible recipient species, (2) heterospecific-pollen treatment for self-compatible recipient and self-compatible donor species, (3) heterospecific-pollen treatment for self-compatible recipient and self-incompatible donor species, (4) conspecific-pollen-only treatment for self-incompatible recipient species, (5) heterospecific-pollen treatment for self-incompatible recipient and self-incompatible donor species, and (6) heterospecific-pollen treatment for self-incompatible recipient and self-compatible donor species. Donor species, recipient species and dataset were included as random factors. SC: self-compatible. SI: self-incompatible.

| Linear hypotheses                                                                                                     | Fruit Set             |                  | Seed Set              |               |
|-----------------------------------------------------------------------------------------------------------------------|-----------------------|------------------|-----------------------|---------------|
|                                                                                                                       | Estimate (SE)         | P (> z )         | Estimate (SE)         | P (> z )      |
| Fruit or seed set higher for SC than for SI recipients                                                                | -0.4796 (0.783)       | 0.9755           | -0.5135 (0.882)       | 0.9805        |
| Fruit or seed set is higher for CP than for HP treatment                                                              | <b>1.3667 (0.259)</b> | <b>&lt;0.001</b> | <b>0.3380 (0.109)</b> | <b>0.0104</b> |
| HPI higher for SC than for SI recipients                                                                              | 0.5857 (0.289)        | 0.1903           | 0.0530 (0.116)        | 0.9933        |
| Fruit or seed set in HP treatment is higher with same self-compatibility than with opposite self-compatibility donors | <b>0.5719 (0.202)</b> | <b>0.0228</b>    | 0.0772 (0.095)        | 0.9223        |
| HPI in HP treatment with opposite self-compatibility donors higher for SC than for SI recipients                      | 0.3608 (0.374)        | 0.8549           | -0.0076 (0.137)       | 1.0000        |
| HPI in HP treatment with same self-compatibility donors higher for SC than for SI recipients                          | <b>0.8106 (0.272)</b> | <b>0.0148</b>    | 0.1136 (0.121)        | 0.8682        |

\*CP: conspecific pollen treatment. HP: heterospecific pollen treatment, HPI: heterospecific pollen interference. SE: standard error.

**Table S.6** Binomial and Gaussian models including phylogenetic distance between pollen donor and recipient species as explanatory variable, for HP interference measured based on fruit set and seed set. Self-compatibility of recipient (self-incompatible or self-compatible) as well as self-compatibility of donor (same self-compatibility or opposite self-compatibility) are included both as factors and as interactions. Seed set is expressed as the natural log of the ratio of the mean number of seeds per plant and the mean number of seeds for conspecific pollen treatment. P-values were calculated by comparing models with and without the factor in question.

| Phylogenetic distance (PD)                               | Fruit Set             |                         | Seed Set               |                         |
|----------------------------------------------------------|-----------------------|-------------------------|------------------------|-------------------------|
| Parameter                                                | Estimate (SE)         | P<br>(>X <sup>2</sup> ) | Estimate (SE)          | P<br>(>X <sup>2</sup> ) |
| <i>Fixed terms</i>                                       |                       |                         |                        |                         |
| Intercept                                                | 0.5449 (0.702)        | 0.436                   | <b>-1.0120 (0.265)</b> | <b>0.005</b>            |
| PD                                                       | -0.1038 (0.392)       | 0.134                   | 0.1344 (0.246)         | 0.151                   |
| Self-compatibility recipient (SC)                        | 1.2060 (0.832)        | 0.152                   | 0.4729 (0.303)         | 0.151                   |
| Self-compatibility donor (opposite)                      | <b>0.6752 (0.419)</b> | <b>0.011</b>            | <b>0.2841 (0.218)</b>  | <b>0.088</b>            |
| Self-compatibility recipient×Self-compatibility donor    | -0.1622 (0.664)       | 0.412                   | -0.1347 (0.274)        | 0.769                   |
| PD×Self-compatibility recipient                          | 0.3091 (0.407)        | 0.965                   | -0.2106 (0.254)        | 0.561                   |
| PD×Self-compatibility donor                              | 0.1741 (0.508)        | 0.338                   | -0.2007 (0.286)        | 0.719                   |
| PD×Self-compatibility recipient×Self-compatibility donor | -1.0551 (0.746)       | 0.155                   | 0.1867 (0.306)         | 0.543                   |
| <i>Random terms</i>                                      | Standard deviation    |                         | Standard deviation     |                         |
| Dataset                                                  | 0.000                 |                         | 1.130*10 <sup>-8</sup> |                         |
| Recipient Species                                        | 1.362                 |                         | 4.213*10 <sup>-1</sup> |                         |
| Donor Species                                            | 0.478                 |                         | 1.416*10 <sup>-1</sup> |                         |
| <i>AIC</i>                                               | <b>958.2</b>          |                         | <b>953.7</b>           |                         |

\*SE: standard error. AIC: Akaike information criterion

**Table S.7** Binomial and Gaussian models including floral trait (pollen size and style length) distance between pollen donor and recipient species as explanatory variable, for HP interference measured based on fruit set and seed set. Self-compatibility of recipient (self-incompatible or self-compatible) as well as self-compatibility of donor (same self-compatibility or opposite self-compatibility) are included both as factors and as interactions. Seed set is expressed as the natural log of the ratio of the mean number of seeds per plant and the mean number of seeds for conspecific pollen treatment. P-values were calculated by comparing models with and without the factor in question.

| Trait distance (TD)                                      | Fruit Set              |                         | Seed Set               |                         |
|----------------------------------------------------------|------------------------|-------------------------|------------------------|-------------------------|
| Parameter                                                | Estimate (SE)          | P<br>(>X <sup>2</sup> ) | Estimate (SE)          | P<br>(>X <sup>2</sup> ) |
| <i>Fixed terms</i>                                       |                        |                         |                        |                         |
| Intercept                                                | 0.0762 (0.735)         | 0.917                   | <b>-1.0845 (0.302)</b> | <b>0.005</b>            |
| TD                                                       | -0.5818 (0.429)        | 0.500                   | -0.2091 (0.264)        | 0.733                   |
| Self-compatibility recipient (SC)                        | 1.590 (0.865)          | 0.193                   | 0.5727 (0.338)         | 0.144                   |
| Self-compatibility donor (opposite)                      | <b>1.2179 (0.476)</b>  | <b>0.005</b>            | 0.3742 (0.260)         | 0.143                   |
| Self-compatibility recipient×Self-compatibility donor    | -0.8588 (0.687)        | 0.662                   | -0.2468 (0.311)        | 0.548                   |
| TD×Self-compatibility recipient                          | 0.7041 (0.449)         | 0.811                   | 0.1809 (0.272)         | 0.675                   |
| TD×Self-compatibility donor                              | 0.7919 (0.461)         | 0.940                   | 0.2819 (0.282)         | 0.189                   |
| TD×Self-compatibility recipient×Self-compatibility donor | <b>-1.0287 (0.521)</b> | <b>0.050</b>            | -0.1622 (0.306)        | 0.598                   |
| <i>Random terms</i>                                      | SD                     |                         | SD                     |                         |
| Dataset                                                  | 7.850*10 <sup>-8</sup> |                         | 0.000                  |                         |
| Recipient Species                                        | 1.379                  |                         | 0.437                  |                         |
| Donor Species                                            | 4.696*10 <sup>-1</sup> |                         | 0.142                  |                         |
| <i>AIC</i>                                               | <b>959.5</b>           |                         | <b>954.3</b>           |                         |

\*SE: standard error. AIC: Akaike information criterion

**Table S.8** Binomial and Gaussian models including style length difference (recipient species – donor species) as explanatory variable, for HP interference measured based on fruit set and seed set. Recipient status (alien or native) as well as donor status (same-status or opposite-status) are included both as factors and as interactions. Seed set is expressed as the natural log of the ratio of the mean number of seeds per plant and the mean number of seeds for conspecific pollen treatment. P-values were calculated by comparing models with and without the factor in question.

| Style length difference (SD)     | Fruit Set              |                    | Seed Set           |                    |
|----------------------------------|------------------------|--------------------|--------------------|--------------------|
| Parameter                        | Estimate               | P                  | Estimate           | P                  |
| <i>Fixed terms</i>               | (SE*)                  | (>X <sup>2</sup> ) | (SE)               | (>X <sup>2</sup> ) |
| Intercept                        | <b>2.3930 (0.659)</b>  | <b>0.0096</b>      | -0.3879 (0.215)    | 0.1165             |
| SD                               | 0.2263 (0.270)         | 0.0524             | 0.2111 (0.104)     | 0.2244             |
| Recipient status (native)        | -1.3182 (0.946)        | 0.3441             | -0.1649 (0.232)    | 0.8035             |
| Donor status (opposite)          | <b>-1.0365 (0.362)</b> | <b>0.0032</b>      | -0.1311 (0.184)    | 0.6164             |
| Recipient status×Donor status    | 0.8450 (0.559)         | 0.1989             | 0.2109 (0.309)     | 0.4989             |
| SD×Recipient status              | <b>-1.4955 (0.488)</b> | <b>0.0005</b>      | -0.2150 (0.208)    | 0.2088             |
| SD×Donor status                  | -0.4471 (0.313)        | 0.3105             | -0.1177 (0.124)    | 0.2834             |
| SD×Recipient status×Donor status | 0.6262 (0.573)         | 0.2713             | 0.0428 (0.266)     | 0.8749             |
| <i>Random terms</i>              | Standard deviation     |                    | Standard deviation |                    |
| Dataset                          | 0.000                  |                    | 0.188              |                    |
| Recipient Species                | 1.599                  |                    | 0.238              |                    |
| Donor Species                    | 0.318                  |                    | 0.234              |                    |
| <b>AIC</b>                       | <b>783.0</b>           |                    | <b>675.1</b>       |                    |

\*SE: standard error. AIC: Akaike information criterion

**Table S.9** Binomial and Gaussian models including pollen size difference (recipient species – donor species) as explanatory variable, for HP interference measured based on fruit set and seed set. Recipient status (alien or native) as well as donor status (same-status or opposite-status) are included both as factors and as interactions. Seed set is expressed as the natural log of the ratio of the mean number of seeds per plant and the mean number of seeds for conspecific pollen treatment. P-values were calculated by comparing models with and without the factor in question.

| Pollen size difference (PS) | Fruit Set |                    | Seed Set |                    |
|-----------------------------|-----------|--------------------|----------|--------------------|
| Parameter                   | Estimate  | P                  | Estimate | P                  |
| <i>Fixed terms</i>          | (SE*)     | (>X <sup>2</sup> ) | (SE)     | (>X <sup>2</sup> ) |



|                                  |                           |               |                           |               |
|----------------------------------|---------------------------|---------------|---------------------------|---------------|
| Intercept                        | <b>2.6734 (0.609)</b>     | <b>0.0049</b> | -0.1522 (0.183)           | 0.4082        |
| PS                               | 0.5667 (0.480)            | 0.8650        | 0.6022 (0.191)            | 0.1565        |
| Recipient status (native)        | -1.3690 (0.857)           | 0.2692        | <b>-0.6543 (0.257)</b>    | <b>0.0413</b> |
| Donor status (opposite)          | <b>-1.0191 (0.364)</b>    | <b>0.0039</b> | -0.3026 (0.151)           | 0.1414        |
| Recipient status×Donor status    | 0.9285 (0.601)            | 0.1447        | 0.2780 (0.241)            | 0.2583        |
| PS×Recipient status              | <b>-0.8603 (0.505)</b>    | <b>0.0314</b> | <b>-0.6381 (0.202)</b>    | <b>0.0110</b> |
| PS×Donor status                  | -0.0742 (0.493)           | 0.4037        | -0.3331 (0.191)           | 0.7193        |
| PS×Recipient status×Donor status | 0.3246 (0.579)            | 0.5774        | 0.4393 (0.238)            | 0.0714        |
| <b><i>Random terms</i></b>       | <b>Standard deviation</b> |               | <b>Standard deviation</b> |               |
| Dataset                          | 0.000                     |               | 0.000                     |               |
| Recipient Species                | 1.526                     |               | 0.408                     |               |
| Donor Species                    | 0.521                     |               | 0.178                     |               |
| <b><i>AIC</i></b>                | <b>952.1</b>              |               | <b>941.9</b>              |               |

\*SE: standard error. AIC: Akaike information criterion

**Table S.10** Custom set contrast matrix used for the linear hypothesis testing and multiple comparisons for parametric models to test whether HP affected fruit set and seed set, and whether this depended on the status of the pollen recipient and donor species

| Recipient       | Native |        |       | Alien |       |        | Linear hypotheses:                                                                            |
|-----------------|--------|--------|-------|-------|-------|--------|-----------------------------------------------------------------------------------------------|
| Donor           | Native | Native | Alien | Alien | Alien | Native |                                                                                               |
| Pollentype      | CP*    | HP*    | HP    | CP    | HP    | HP     |                                                                                               |
| Contrast Matrix | 1/3    | 1/3    | 1/3   | -1/3  | -1/3  | -1/3   | Fruit or seed set higher for native than for alien recipients                                 |
|                 | 1/2    | -1/4   | -1/4  | 1/2   | -1/4  | -1/4   | Fruit or seed set is higher for CP than for HP treatment                                      |
|                 | 1/2    | -1/4   | -1/4  | -1/2  | 1/4   | 1/4    | HPI higher for native than for alien recipients                                               |
|                 | 0      | 1/2    | -1/2  | 0     | 1/2   | -1/2   | Fruit or seed set in HP treatment is higher with same status than with opposite status donors |
|                 | 1/2    | 0      | -1/2  | -1/2  | 0     | 1/2    | HPI in HP treatment with opposite status donors higher for native than for alien recipients   |
|                 | 1/2    | -1/2   | 0     | -1/2  | 1/2   | 0      | HPI in HP treatment with same status donors higher for native than for alien recipients       |

\*CP: conspecific pollen treatment. HP: heterospecific pollen treatment, HPI: heterospecific pollen interference.

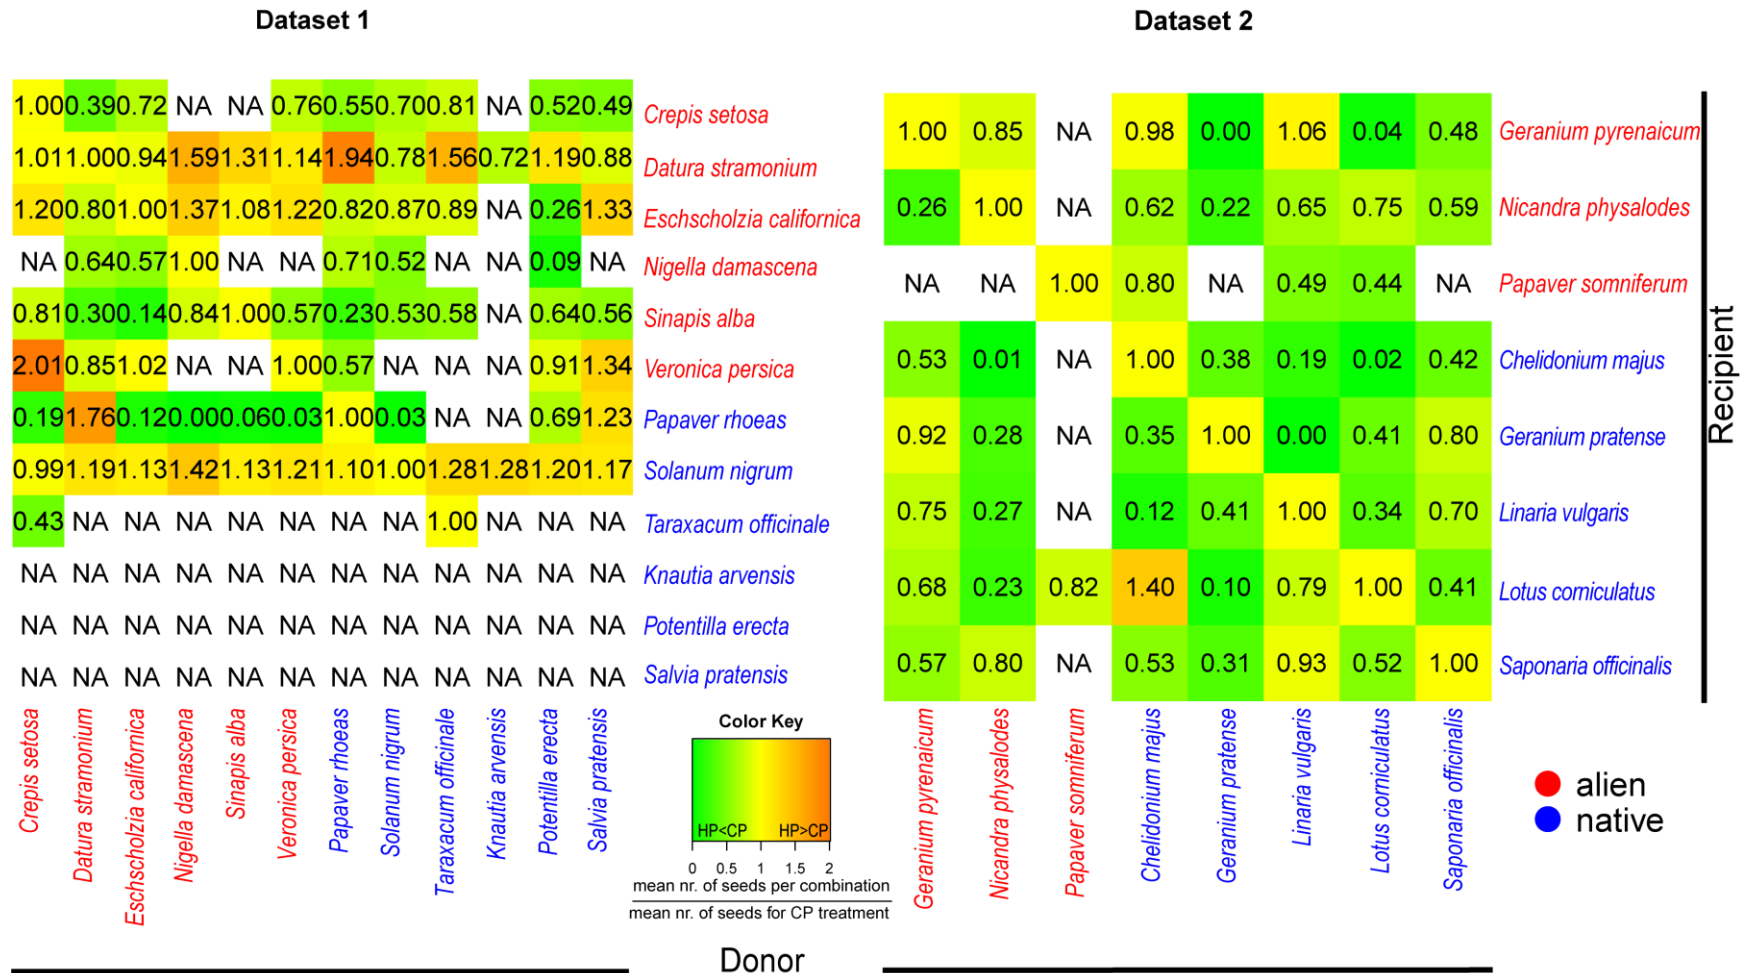

**Figure S.1** Pollen Recipient-Donor combinations for the two datasets with the average effect size per combination for number of seeds per fruit. Note that for Dataset 1, *Knautia arvensis*, *Salvia pratensis* and *Potentilla erecta* are present as donors only. . As we initially focused on the novel question whether alien plants suffer from HP interference, we prioritized in the first group those species combinations in which the alien species were pollen recipients. In the second group, we therefore added more of the combinations in which natives are pollen recipients.

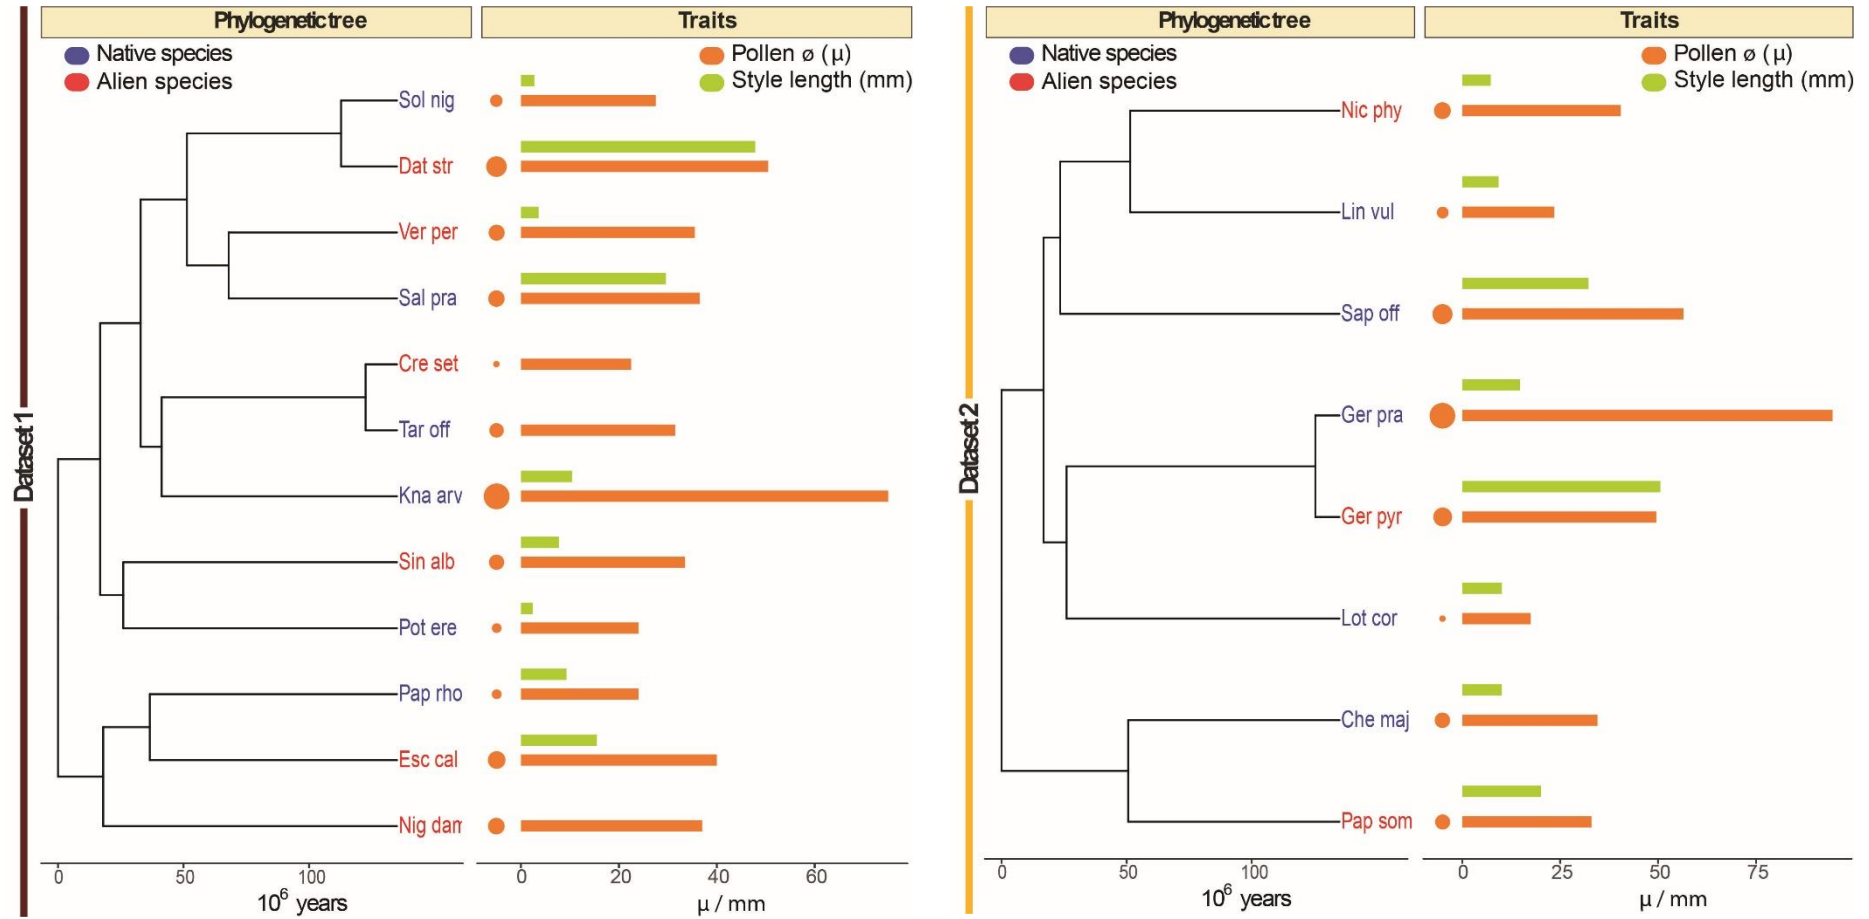

**Figure S.2** Phylogenetic tree and traits measured for the species of the two datasets, pollen size ( $\mu$ ) and style length (mm) (means per species). Species names are shortened (see Table S.1 for complete list)

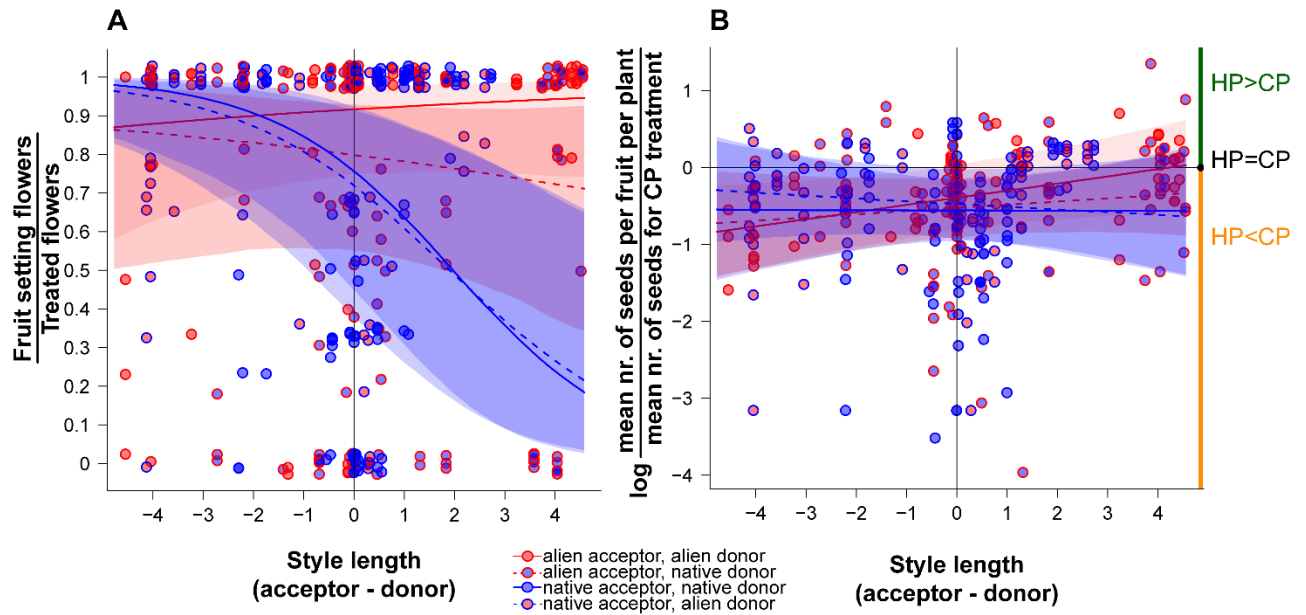

**Figure S.3** Data points for each individual plant receiving HP treatment and fitted lines (with 95 % credible intervals) for the binomial and Gaussian models including style length difference (recipient species – donor species) as explanatory variable, for fruit set (A) and seed set (B). Seed set is expressed as the natural log of the ratio of the mean number of seeds per plant and the mean number of seeds for conspecific pollen treatment. Blue solid line and blue dots: native recipient with native donor. Blue dotted line and blue dots with red background: native recipient with alien donor. Red solid line and red dots: alien recipient with alien donor. Red dotted line and red dots with blue background: alien recipient with native donor. CP: conspecific pollen treatment. HP: heterospecific pollen treatment.

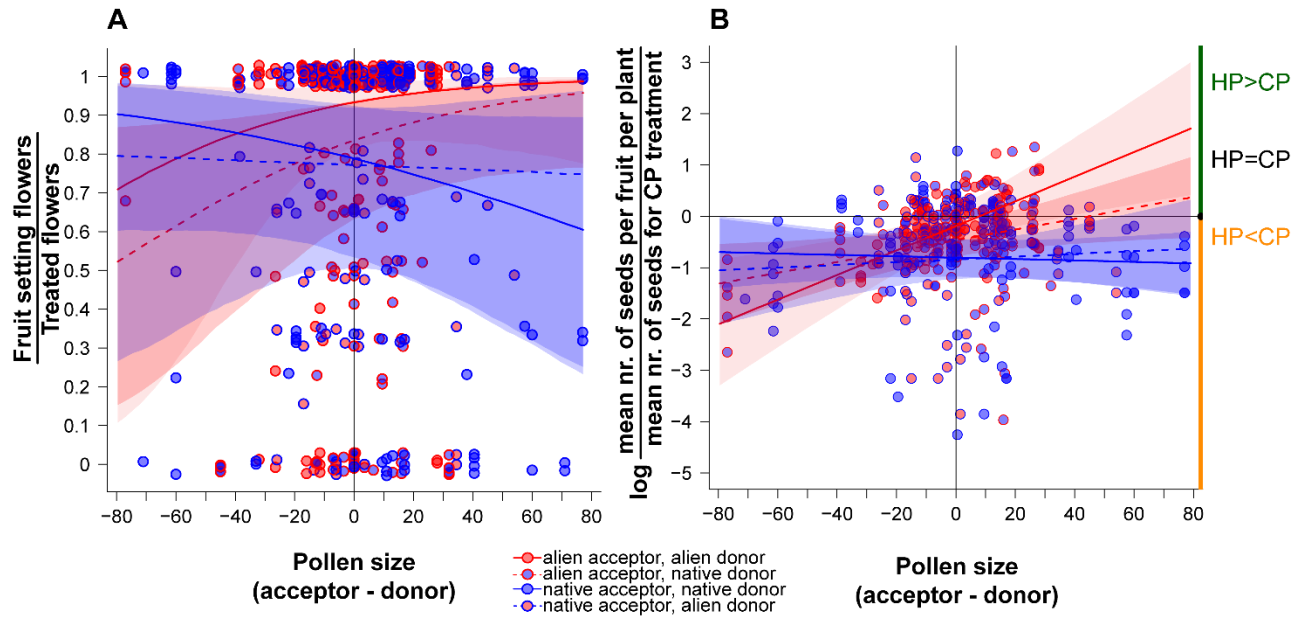

**Figure S.4** Data points for each individual plant receiving HP treatment and fitted lines (with 95% credible intervals) for the binomial and Gaussian models including pollen size difference (recipient species – donor species) as explanatory variable, for fruit set (A) and seed set (B). Seed set is expressed as the natural log of the ratio of the mean number of seeds per plant and the mean number of seeds for conspecific pollen treatment. Blue solid line and blue dots: native recipient with native donor. Blue dotted line and blue dots with red background: native recipient with alien donor. Red solid line and red dots: alien recipient with alien donor. Red dotted line and red dots with blue background: alien recipient with blue donor. CP: conspecific pollen treatment. HP: heterospecific pollen treatment.

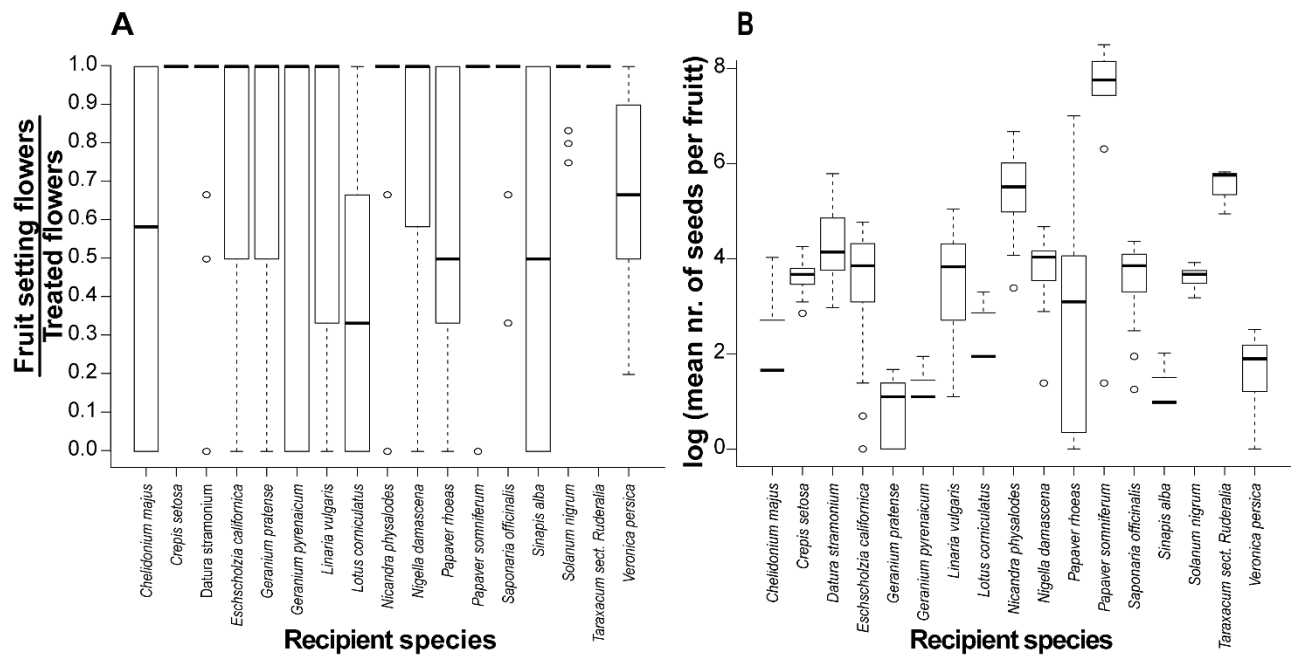

**Figure S.5** Boxplot showing the raw data for the different pollination treatments per Recipient species, for fruit set expressed as the proportion of fruit setting flowers on treated flowers (A) and seed set expressed as the natural log of the number of seeds per fruit per plant (B).
